# Supplementary material
Source: PubMed Central journal article supplement (PMC5053553)
Supplement: kccy-15-19-1209613-s001.pdf [file kccy-15-19-1209613-s001.pdf]

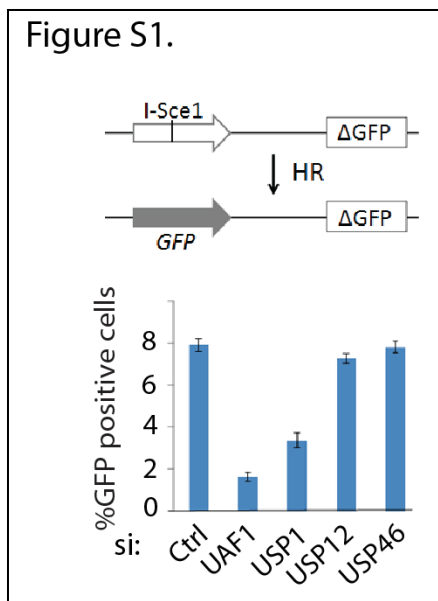

**Figure S1.** USP1 or UAF1 knockdown inhibits the HR repair activity in the DR-GFP assay.

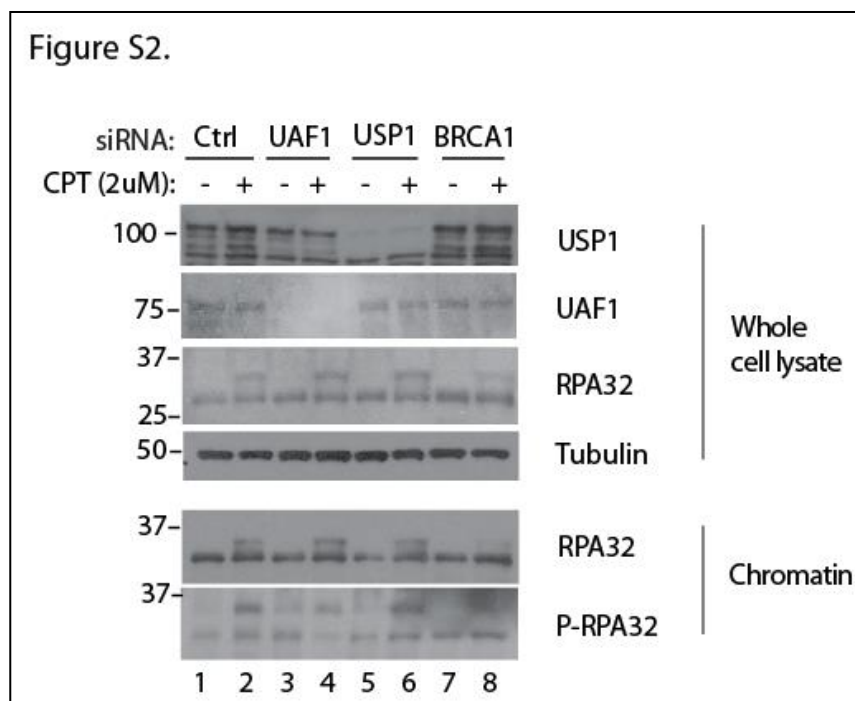

**Figure S2.** USP1 or UAF1 knockdown does not significantly affect the CPT-induced RPA phosphorylation. HeLa cells were treated with the corresponding siRNAs, then ~60 hours later the cells were treated with 2uM Camptothecin (CPT) for ~16 hours, followed by harvesting the cells for western blotting. P-RPA indicates phospho-RPA32 (S4/S8).

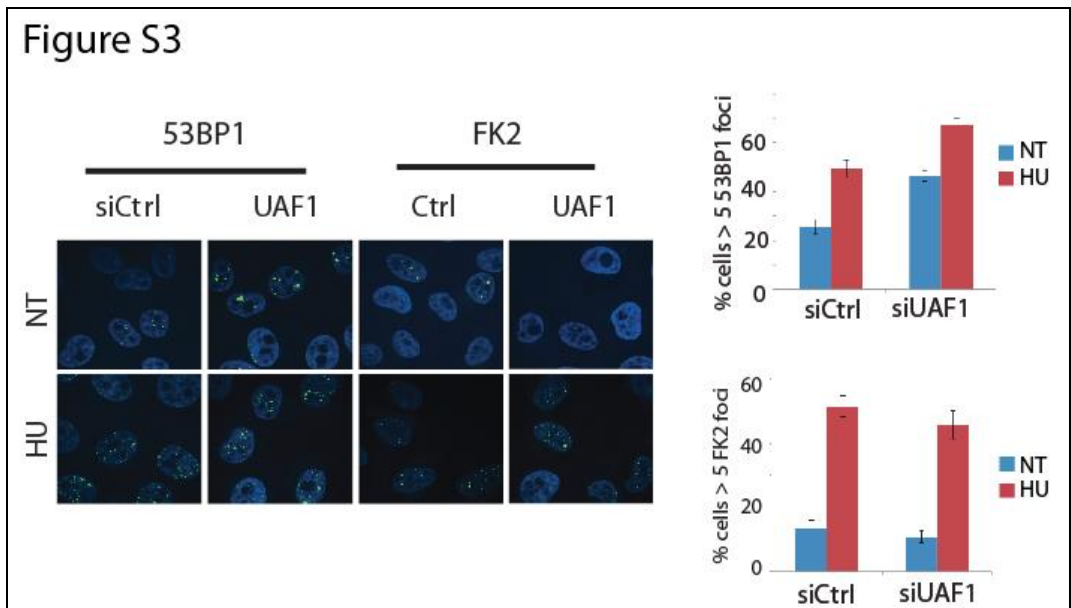

**Figure S3.** USP1 or UAF1 knockdown does not impact on canonical DSB signaling mediators 53BP1 and Ubiquitin (FK2 antibody). On the right is the quantification of three independent experiments.

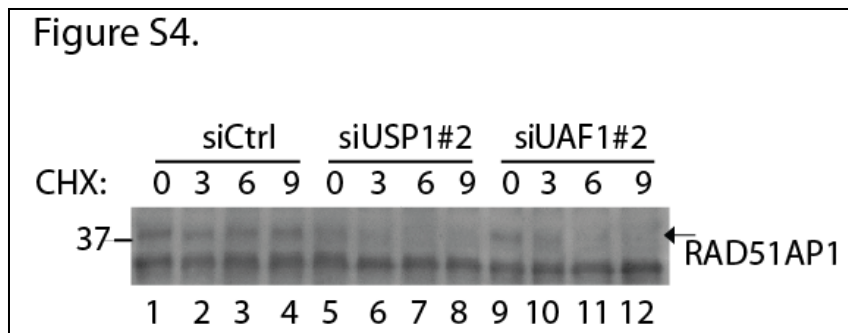

**Figure S4.** Transfecting 2<sup>nd</sup> siRNAs for USP1 and UAF1 also affects RAD51AP1 stability in HEY cells.

Figure S5.

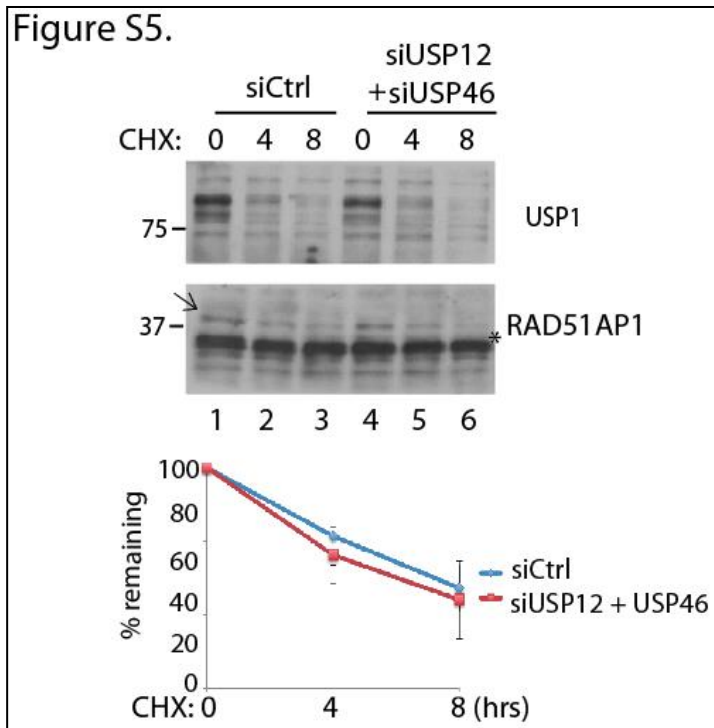

**Figure S5.** USP12 or USP46 does not significantly affect the RAD51AP1 stability (\*indicates non-specific band)

Figure S6.

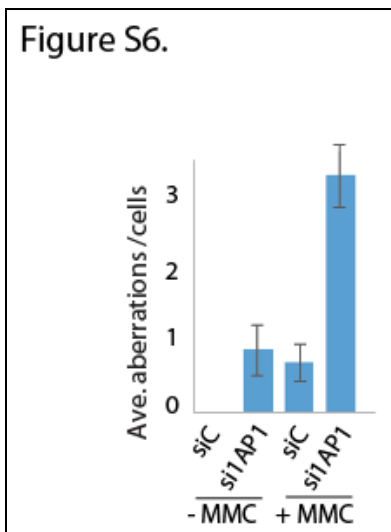

**Figure S6.** RAD51AP1 knockdown in U2OS cells increases chromosomal aberrations in response to MMC (100nM, 48 hours). Quantification was done from three independent experiments.

Figure S7.

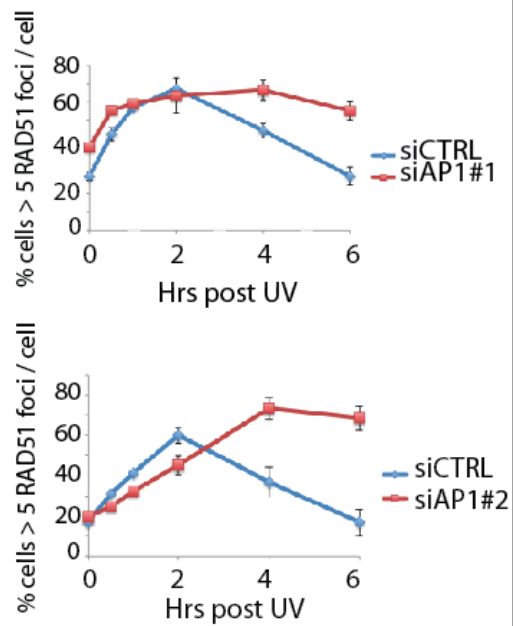

**Figure S7.** RAD51AP1 (AP1) knockdown (two siRNAs) in HeLa cells impairs the RAD51 foci resolution. Quantification was done from triplicates.
